# Supplementary material for: Vi-Vaccinations Induce Heterogeneous Plasma Cell Responses That Associate With Protection From Typhoid Fever
Source: PubMed Central journal article supplement (PMC7793947; doi:10.3389/fimmu.2020.574057), 2020-12-03
Supplement: DataSheet_1.pdf [file DataSheet_1.pdf]

|                |       | <b>Median age (IQR - in years)</b> | <b>Sex (Female)</b> |
|----------------|-------|------------------------------------|---------------------|
| <b>CyTOF</b>   | Vi-TT | 31.2<br>(22.6 - 50.1)              | 11/19<br>(58%)      |
|                | Vi-PS | 29.2<br>(22.2 - 35.6)              | 9/20<br>(45%)       |
| <b>ELISpot</b> | Vi-TT | 25.5<br>(23.0 - 37.8)              | 19/41<br>(46%)      |
|                | Vi-PS | 30.5<br>(22.9 - 44.4)              | 13/37<br>(35%)      |

### **Supplementary Data 1 – Participant characteristics**

Summary statistics are provided based on participants with baseline CyTOF or any ELISpot data. Exact age of participant at D0 was used for calculations.

Vi-TT – Vi Tetanus Toxoid Conjugate Vaccine, Vi-PS – Vi polysaccharide vaccine, IQR – interquartile range, CyTOF – cytometry time of flight, ELISpot – Enzyme-linked immunosorbent spot
