# Supplementary material for: Vi-Vaccinations Induce Heterogeneous Plasma Cell Responses That Associate With Protection From Typhoid Fever
Source: PubMed Central journal article supplement (PMC7793947; doi:10.3389/fimmu.2020.574057), 2020-12-03
Supplement: DataSheet_2.pdf [file DataSheet_2.pdf]

| Cocktail  | Metal | Metal source   | Antibody | Antibody Clone | Reagent source | Reagent supplier |
|-----------|-------|----------------|----------|----------------|----------------|------------------|
| Barcoding | 89Y   | Fluidigm       | CD45     | HI100          | Commercial     | Fluidigm         |
| Barcoding | 102Pd | Trace Sciences | CD45     | HI100          | in-house       | Biolegend        |
| Barcoding | 105Pd | Trace Sciences | CD45     | HI100          | in-house       | Biolegend        |
| Barcoding | 108Pd | Trace Sciences | CD45     | HI100          | in-house       | Biolegend        |
| Barcoding | 110Pd | Trace Sciences | CD45     | HI100          | in-house       | Biolegend        |
| Primary   | 113In | Trace Sciences | CD57     | HCD57          | in-house       | Biolegend        |
| Primary   | 115In | Sigma-Aldrich  | HLA-DR   | G46.6          | in-house       | BD               |
| Primary   | 141Pr | Fluidigm       | CCR6     | G034E3         | Commercial     | Fluidigm         |
| Primary   | 142Nd | Fluidigm       | CD19     | H1B19          | Commercial     | Fluidigm         |
| Primary   | 144Nd | Fluidigm       | IgG      | G18-145        | in-house       | BD               |
| Primary   | 145Nd | Fluidigm       | CD4      | RPA-T4         | Commercial     | Fluidigm         |
| Primary   | 146Nd | Fluidigm       | IgD      | IA6-2          | Commercial     | Fluidigm         |
| Primary   | 147Sm | Fluidigm       | CD20     | 2H7            | Commercial     | Fluidigm         |
| Primary   | 148Nd | Fluidigm       | IgA      | G18-1          | in-house       | BD               |
| Primary   | 149Sm | Fluidigm       | CD56     | NCAM16.2       | Commercial     | Fluidigm         |
| Primary   | 150Nd | Fluidigm       | CD86     | IT2.2          | Commercial     | Fluidigm         |
| Primary   | 151Eu | Fluidigm       | ICOS     | C398.4A        | Commercial     | Fluidigm         |
| Primary   | 152Sm | Fluidigm       | TCRgd    | 11F2           | Commercial     | Fluidigm         |
| Primary   | 153Eu | Fluidigm       | CD45RA   | HI100          | Commercial     | Fluidigm         |
| Primary   | 154Sm | Fluidigm       | CD123    | 9F5            | in-house       | BD               |
| Primary   | 155Gd | Fluidigm       | CD27     | L128           | Commercial     | Fluidigm         |
| Primary   | 156Gd | Fluidigm       | CXCR3    | G025H7         | Commercial     | Fluidigm         |

|              |       |               |           |                         |            |                          |
|--------------|-------|---------------|-----------|-------------------------|------------|--------------------------|
| Primary      | NA    | NA            | NKG2A-PE  | Z199                    | Commercial | Beckman-Coulter          |
| Secondary    | 158Gd | Fluidigm      | anti-PE   | PE001                   | in-house   | Biolegend                |
| Primary      | 159Tb | Fluidigm      | CD11c     | Bu15                    | Commercial | Fluidigm                 |
| Primary      | 160Gd | Fluidigm      | CD14      | M5E2                    | Commercial | Fluidigm                 |
| Primary      | 161Dy | Fluidigm      | CD26      | BA5b                    | Commercial | Fluidigm                 |
| Primary      | 162Dy | Fluidigm      | CD8a      | RPA-T8                  | Commercial | Fluidigm                 |
| Primary      | 163Dy | Fluidigm      | CD33      | WM53                    | Commercial | Fluidigm                 |
| Primary      | 164Dy | Fluidigm      | CD161     | HP-3G10                 | Commercial | Fluidigm                 |
| Primary      | 165Ho | Fluidigm      | CD127     | A019D5                  | Commercial | Fluidigm                 |
| Primary      | NA    | NA            | CCR10-APC | 1B5                     | Commercial | BD                       |
| Secondary    | 166Er | Fluidigm      | anti-APC  | APC003                  | in-house   | Biolegend                |
| Primary      | 167Er | Fluidigm      | CCR7      | G043H7                  | Commercial | Fluidigm                 |
| Primary      | 168Er | Fluidigm      | CCR9      | L053E8                  | Commercial | Fluidigm                 |
| Primary      | 169Tm | Fluidigm      | CD25      | 2A3                     | Commercial | Fluidigm                 |
| Primary      | 170Er | Fluidigm      | CD3       | UCHT1                   | Commercial | Fluidigm                 |
| Primary      | 171Yb | Fluidigm      | CXCR5     | RF8B2                   | Commercial | Fluidigm                 |
| Primary      | 172Yb | Fluidigm      | CD38      | HIT2                    | Commercial | Fluidigm                 |
| Primary      | 173Yb | Fluidigm      | a4b7      | Act1                    | in-house   | NIH AIDS Reagent Program |
| Primary      | 174Yb | Fluidigm      | PD-1      | EH12.2H7                | Commercial | Fluidigm                 |
| Primary      | 175Lu | Sigma-Aldrich | CD62L     | DREG200                 | in-house   | HIMC                     |
| Primary      | 176Yb | Fluidigm      | CLA       | HECA-452                | Commercial | Fluidigm                 |
| Primary      | 209Bi | Fluidigm      | CD16      | 3G8                     | Commercial | Fluidigm                 |
| Live-dead    | Pt195 | Fluidigm      |           | cisplatin (nat. abund.) | Commercial | Fluidigm                 |
| Intercalator | Ir191 | Fluidigm      |           | Intercalator            | Commercial | Fluidigm                 |
| Intercalator | Ir193 | Fluidigm      |           | Intercalator            | Commercial | Fluidigm                 |

**Supplementary Data 2 – Overview of antibodies used in CyTOF staining**

**In-house conjugations performed by Dr. Michael Leipold at the Human Immune Monitoring Center (HIMC) at Stanford University**
