# Supplementary material for: Vi-Vaccinations Induce Heterogeneous Plasma Cell Responses That Associate With Protection From Typhoid Fever
Source: PubMed Central journal article supplement (PMC7793947; doi:10.3389/fimmu.2020.574057), 2020-12-03

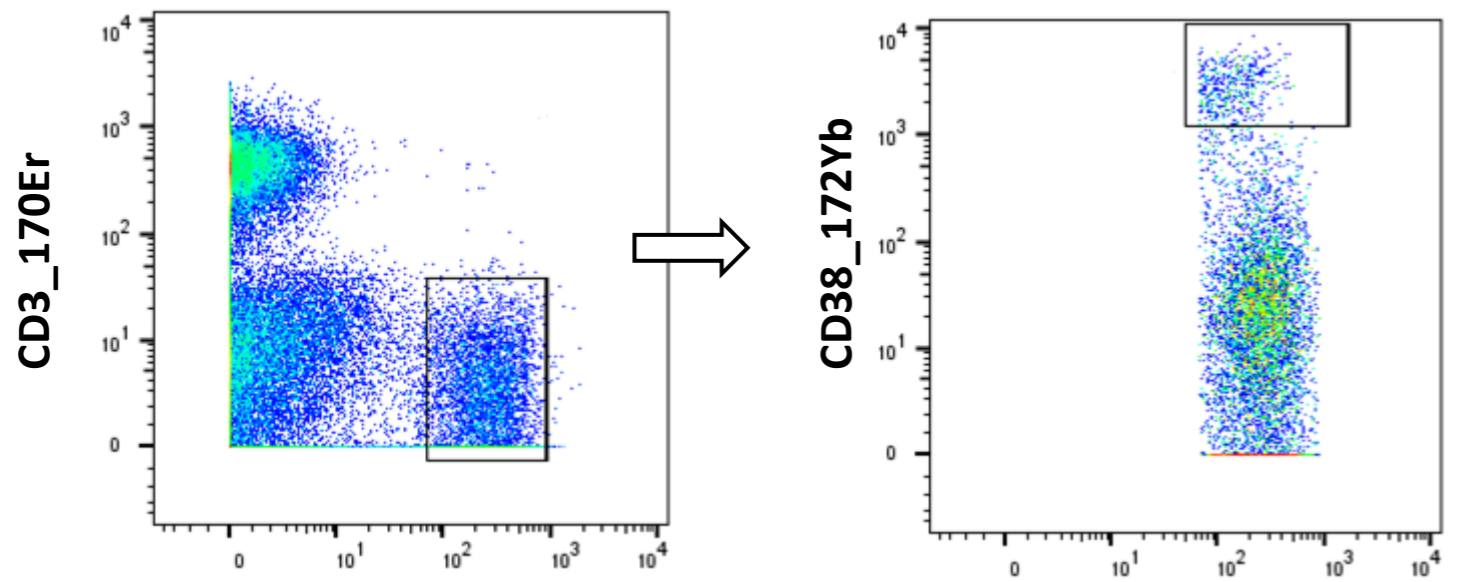

### Supplementary Data 4 – Gating strategies

These figures show an overview of the two gating strategies that were used. The upper panel illustrates the gating of CD38++ plasma cells, while the lower panel illustrates the gating of PD1+ ICOS+ Tfh cells

CD19\_142Nd  
CD3+ cells

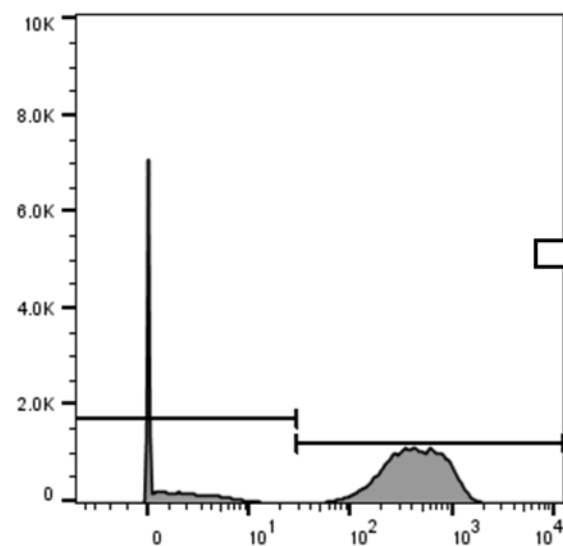

CD4+ T cells

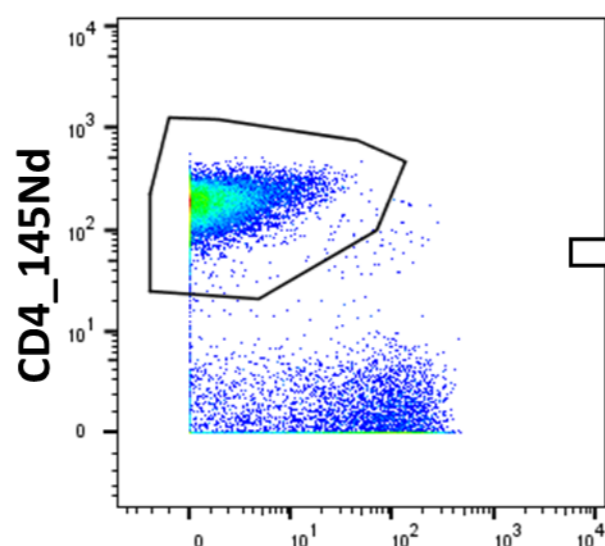

CD4+ CXCR5+ CD45RA- T cells

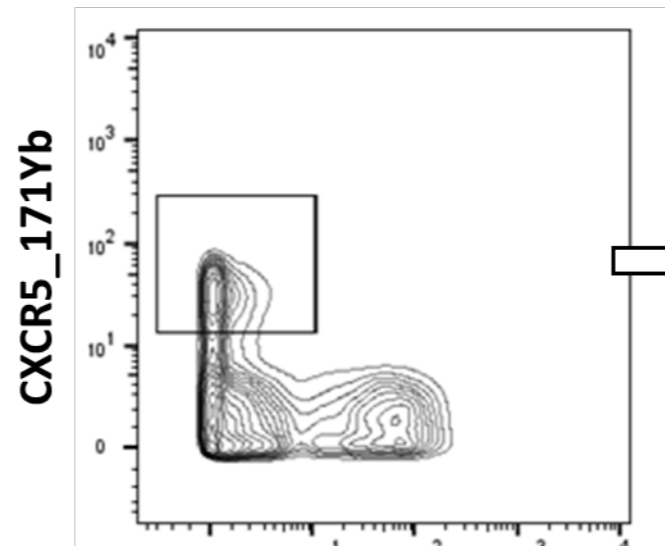

PD1+ ICOS+ Tfh cells

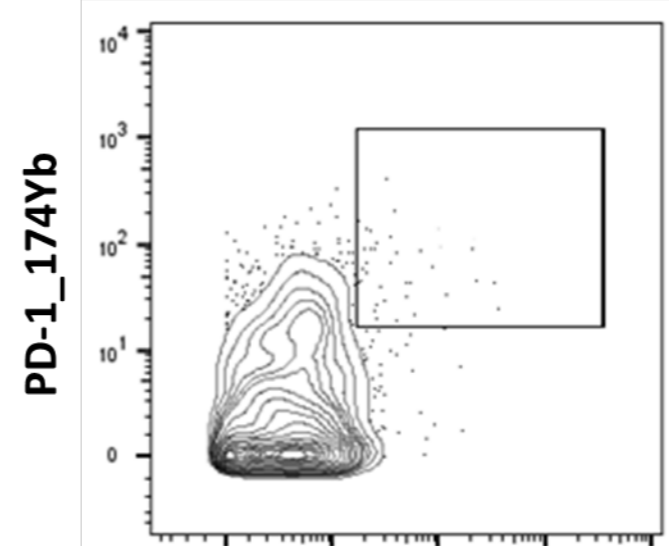

Supplement: DataSheet_4.pdf [file DataSheet_4.pdf]
