# Supplementary material for: Vi-Vaccinations Induce Heterogeneous Plasma Cell Responses That Associate With Protection From Typhoid Fever
Source: PubMed Central journal article supplement (PMC7793947; doi:10.3389/fimmu.2020.574057), 2020-12-03
Supplement: DataSheet_6.pdf [file DataSheet_6.pdf]

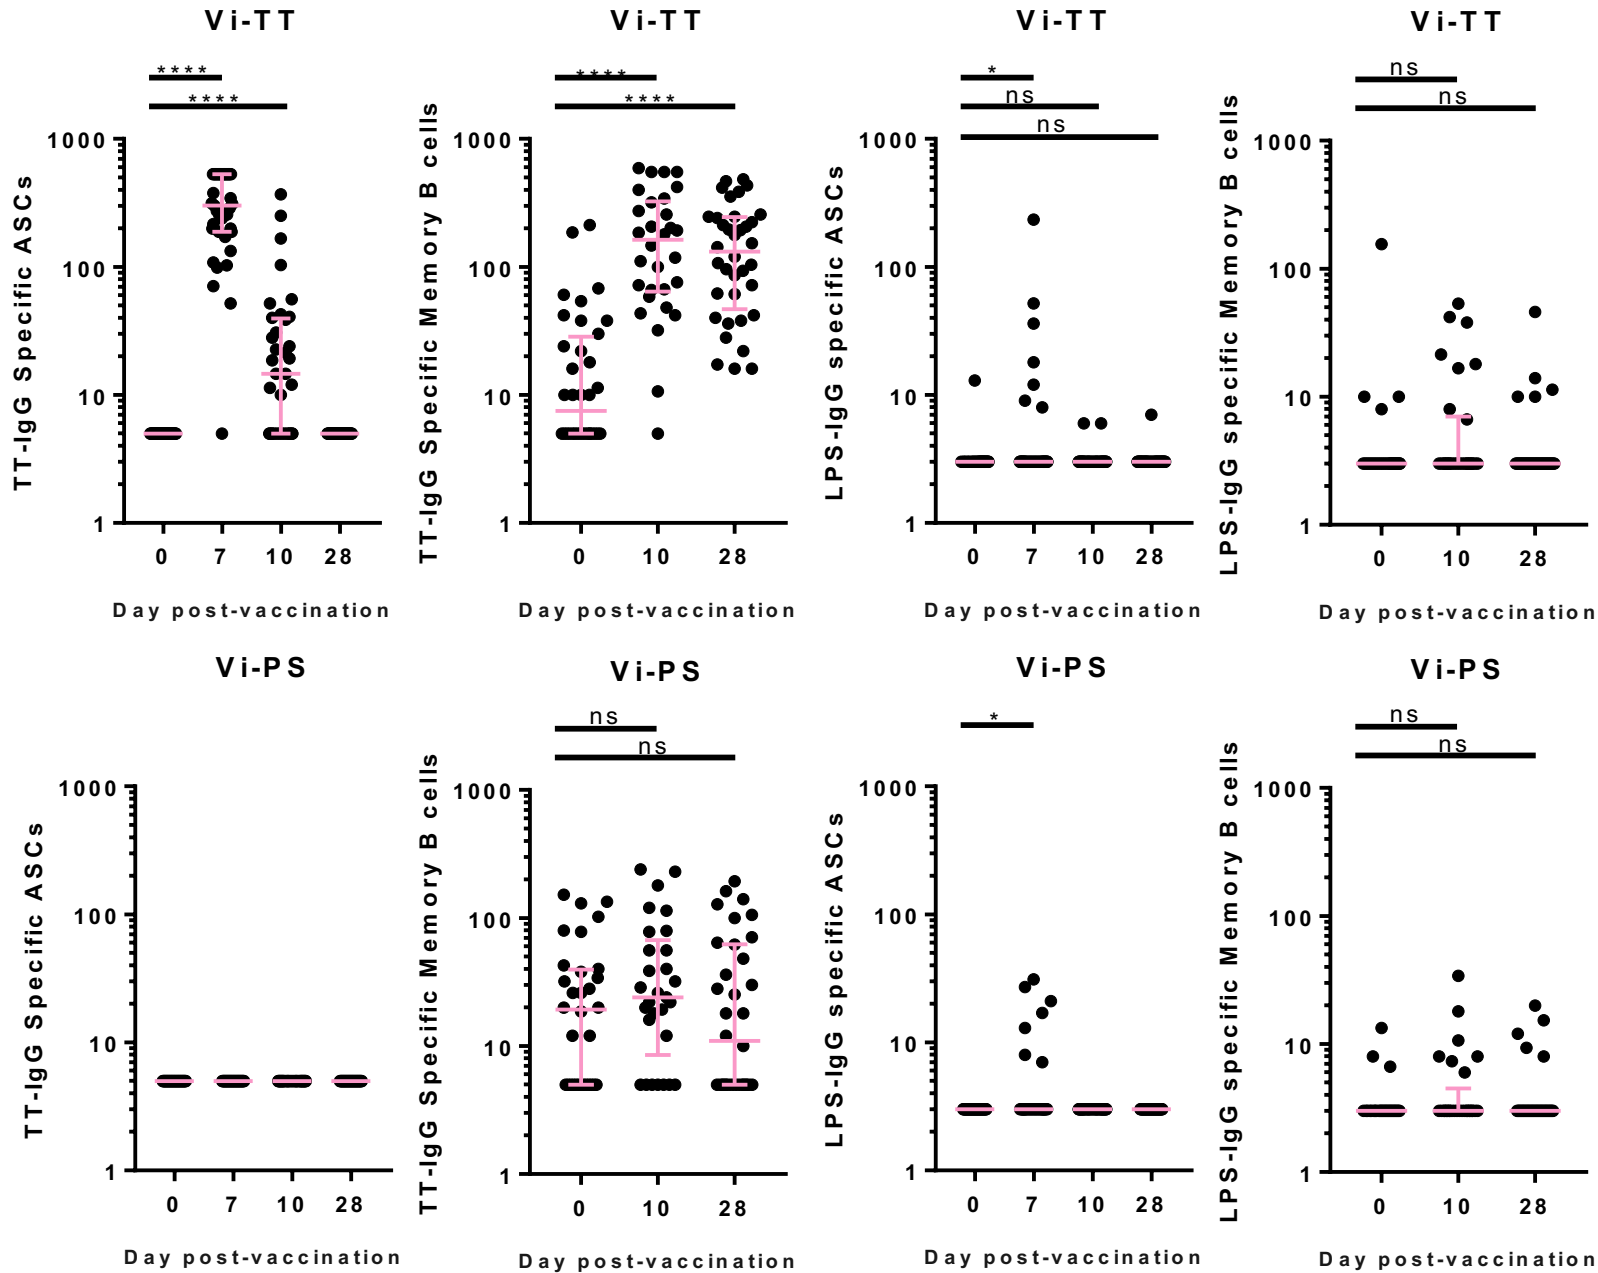

**Supplementary Data 6 – TT-IgG and LPS ASC or memory B cells after conjugate or polysaccharide vaccination.**

The number of TT-IgG or LPS-IgG specific antibody secreting cells (ASC) or memory B cells expressed as specific cell / 10<sup>6</sup> cells was measured by ELISpot. Results for recipients of the Vi-TT vaccine are shown in the top row and for recipients of Vi-PS in the bottom row.

Significance was determined by a wilcoxon signed paired rank test. \* p < 0.05, \*\* p < 0.01, \*\*\* p < 0.001, \*\*\*\* p < 0.0001, ns = not significant.

Vi-PS = Vi-polysaccharide vaccine; Vi-TT = Vi-tetanus conjugate vaccine
