# Supplementary material for: Vi-Vaccinations Induce Heterogeneous Plasma Cell Responses That Associate With Protection From Typhoid Fever
Source: PubMed Central journal article supplement (PMC7793947; doi:10.3389/fimmu.2020.574057), 2020-12-03

## Supplementary Data 7:

Archsinh-transformed marker intensity distributions for 37 markers across 24 clusters generated by FlowSOM. For convenience, clusters referenced throughout the paper were renamed A-E. In this plot, clusters are identifiable by their original cluster IDs (see below):

Cluster A: 18

Cluster B: 17

Cluster C: 16

Cluster D: 11

Cluster E: 8

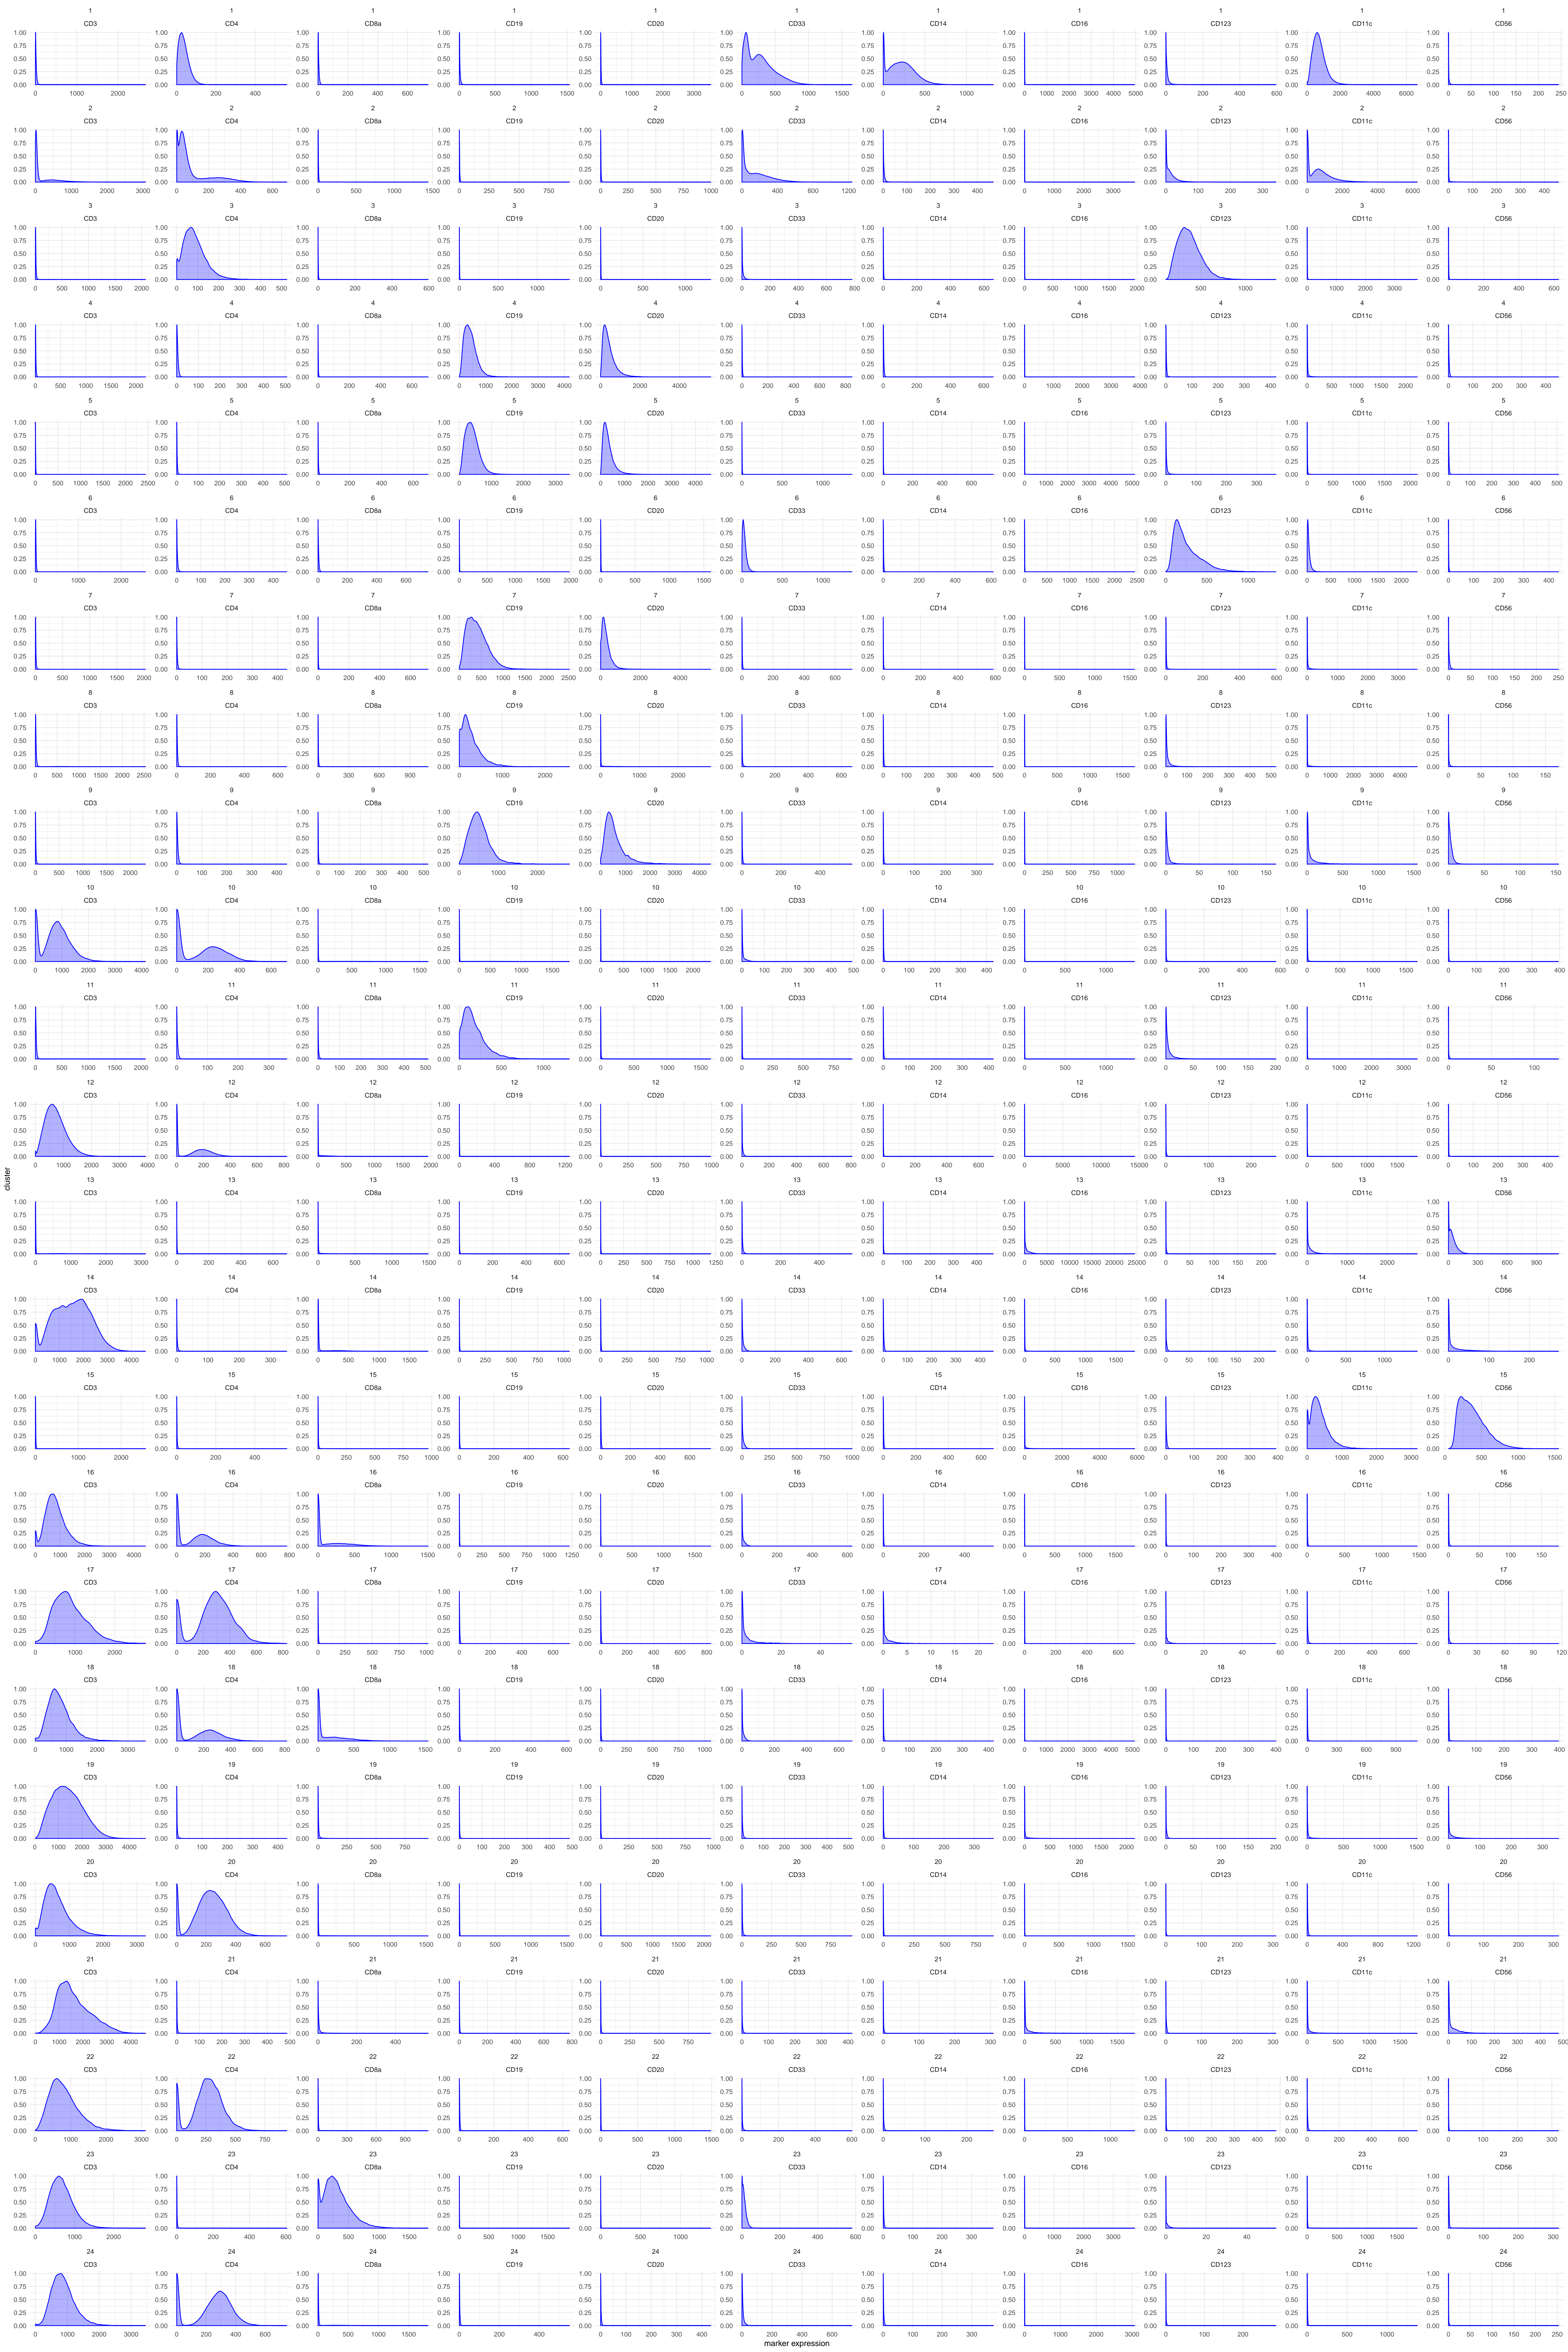

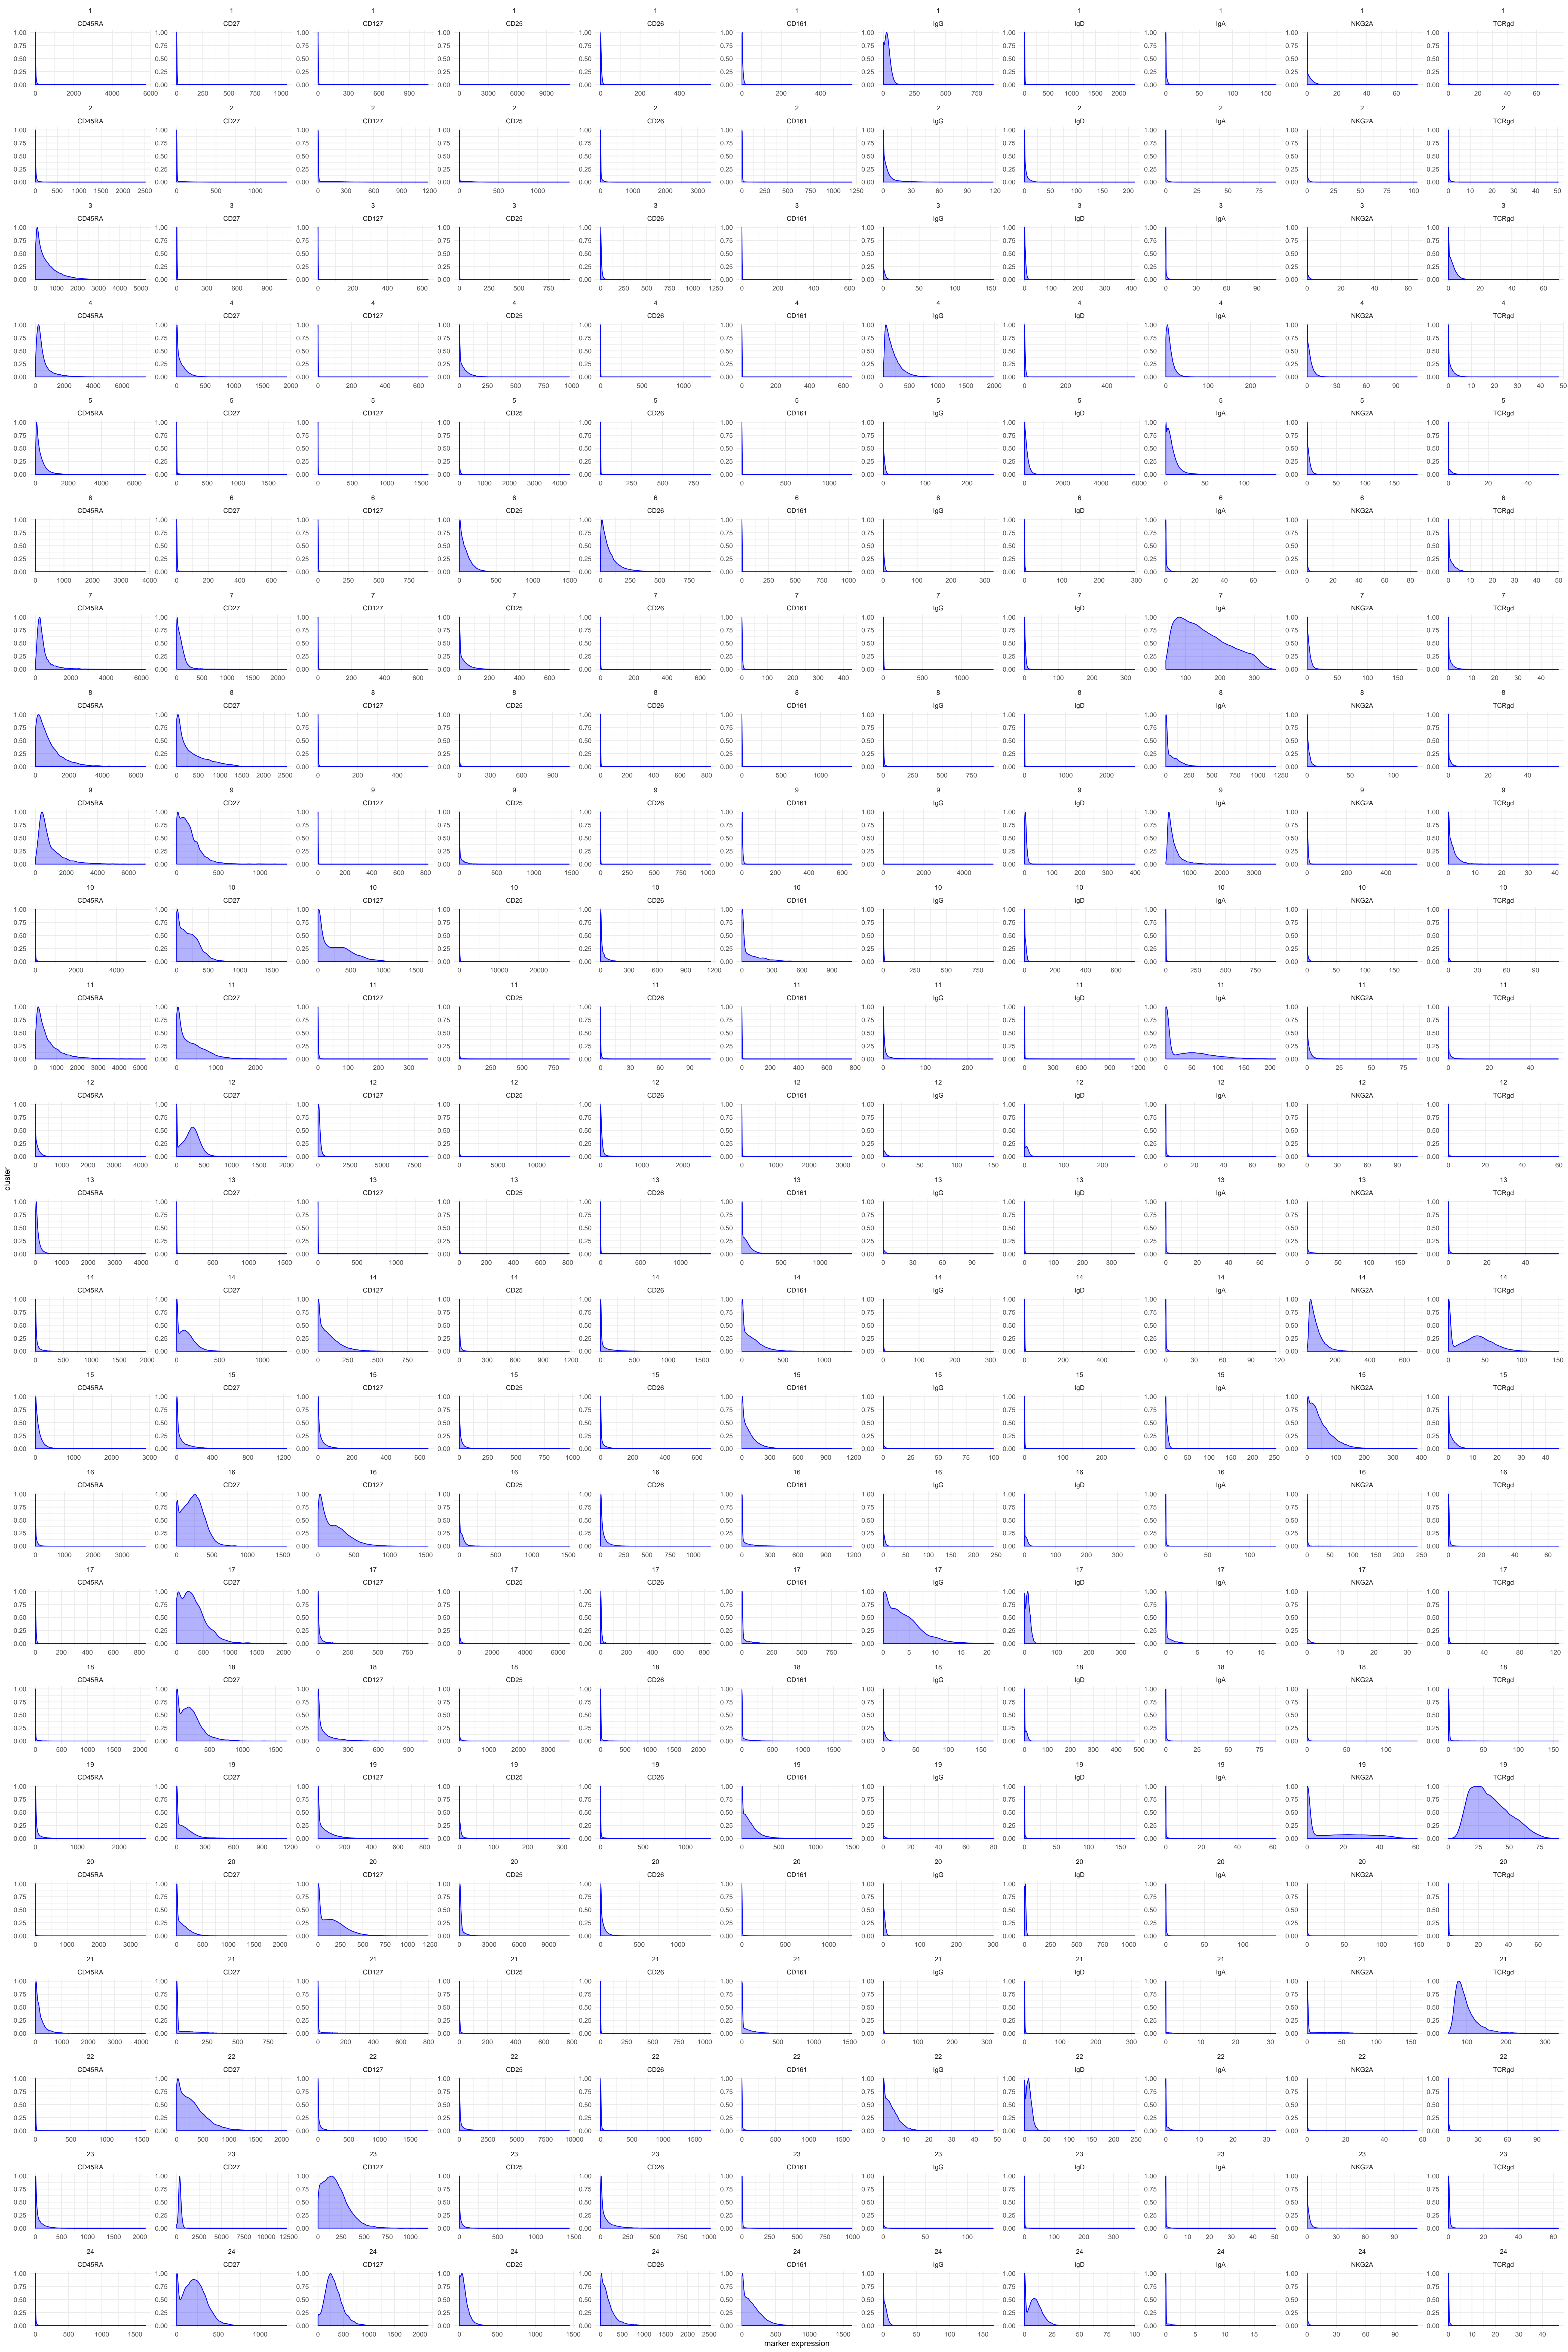

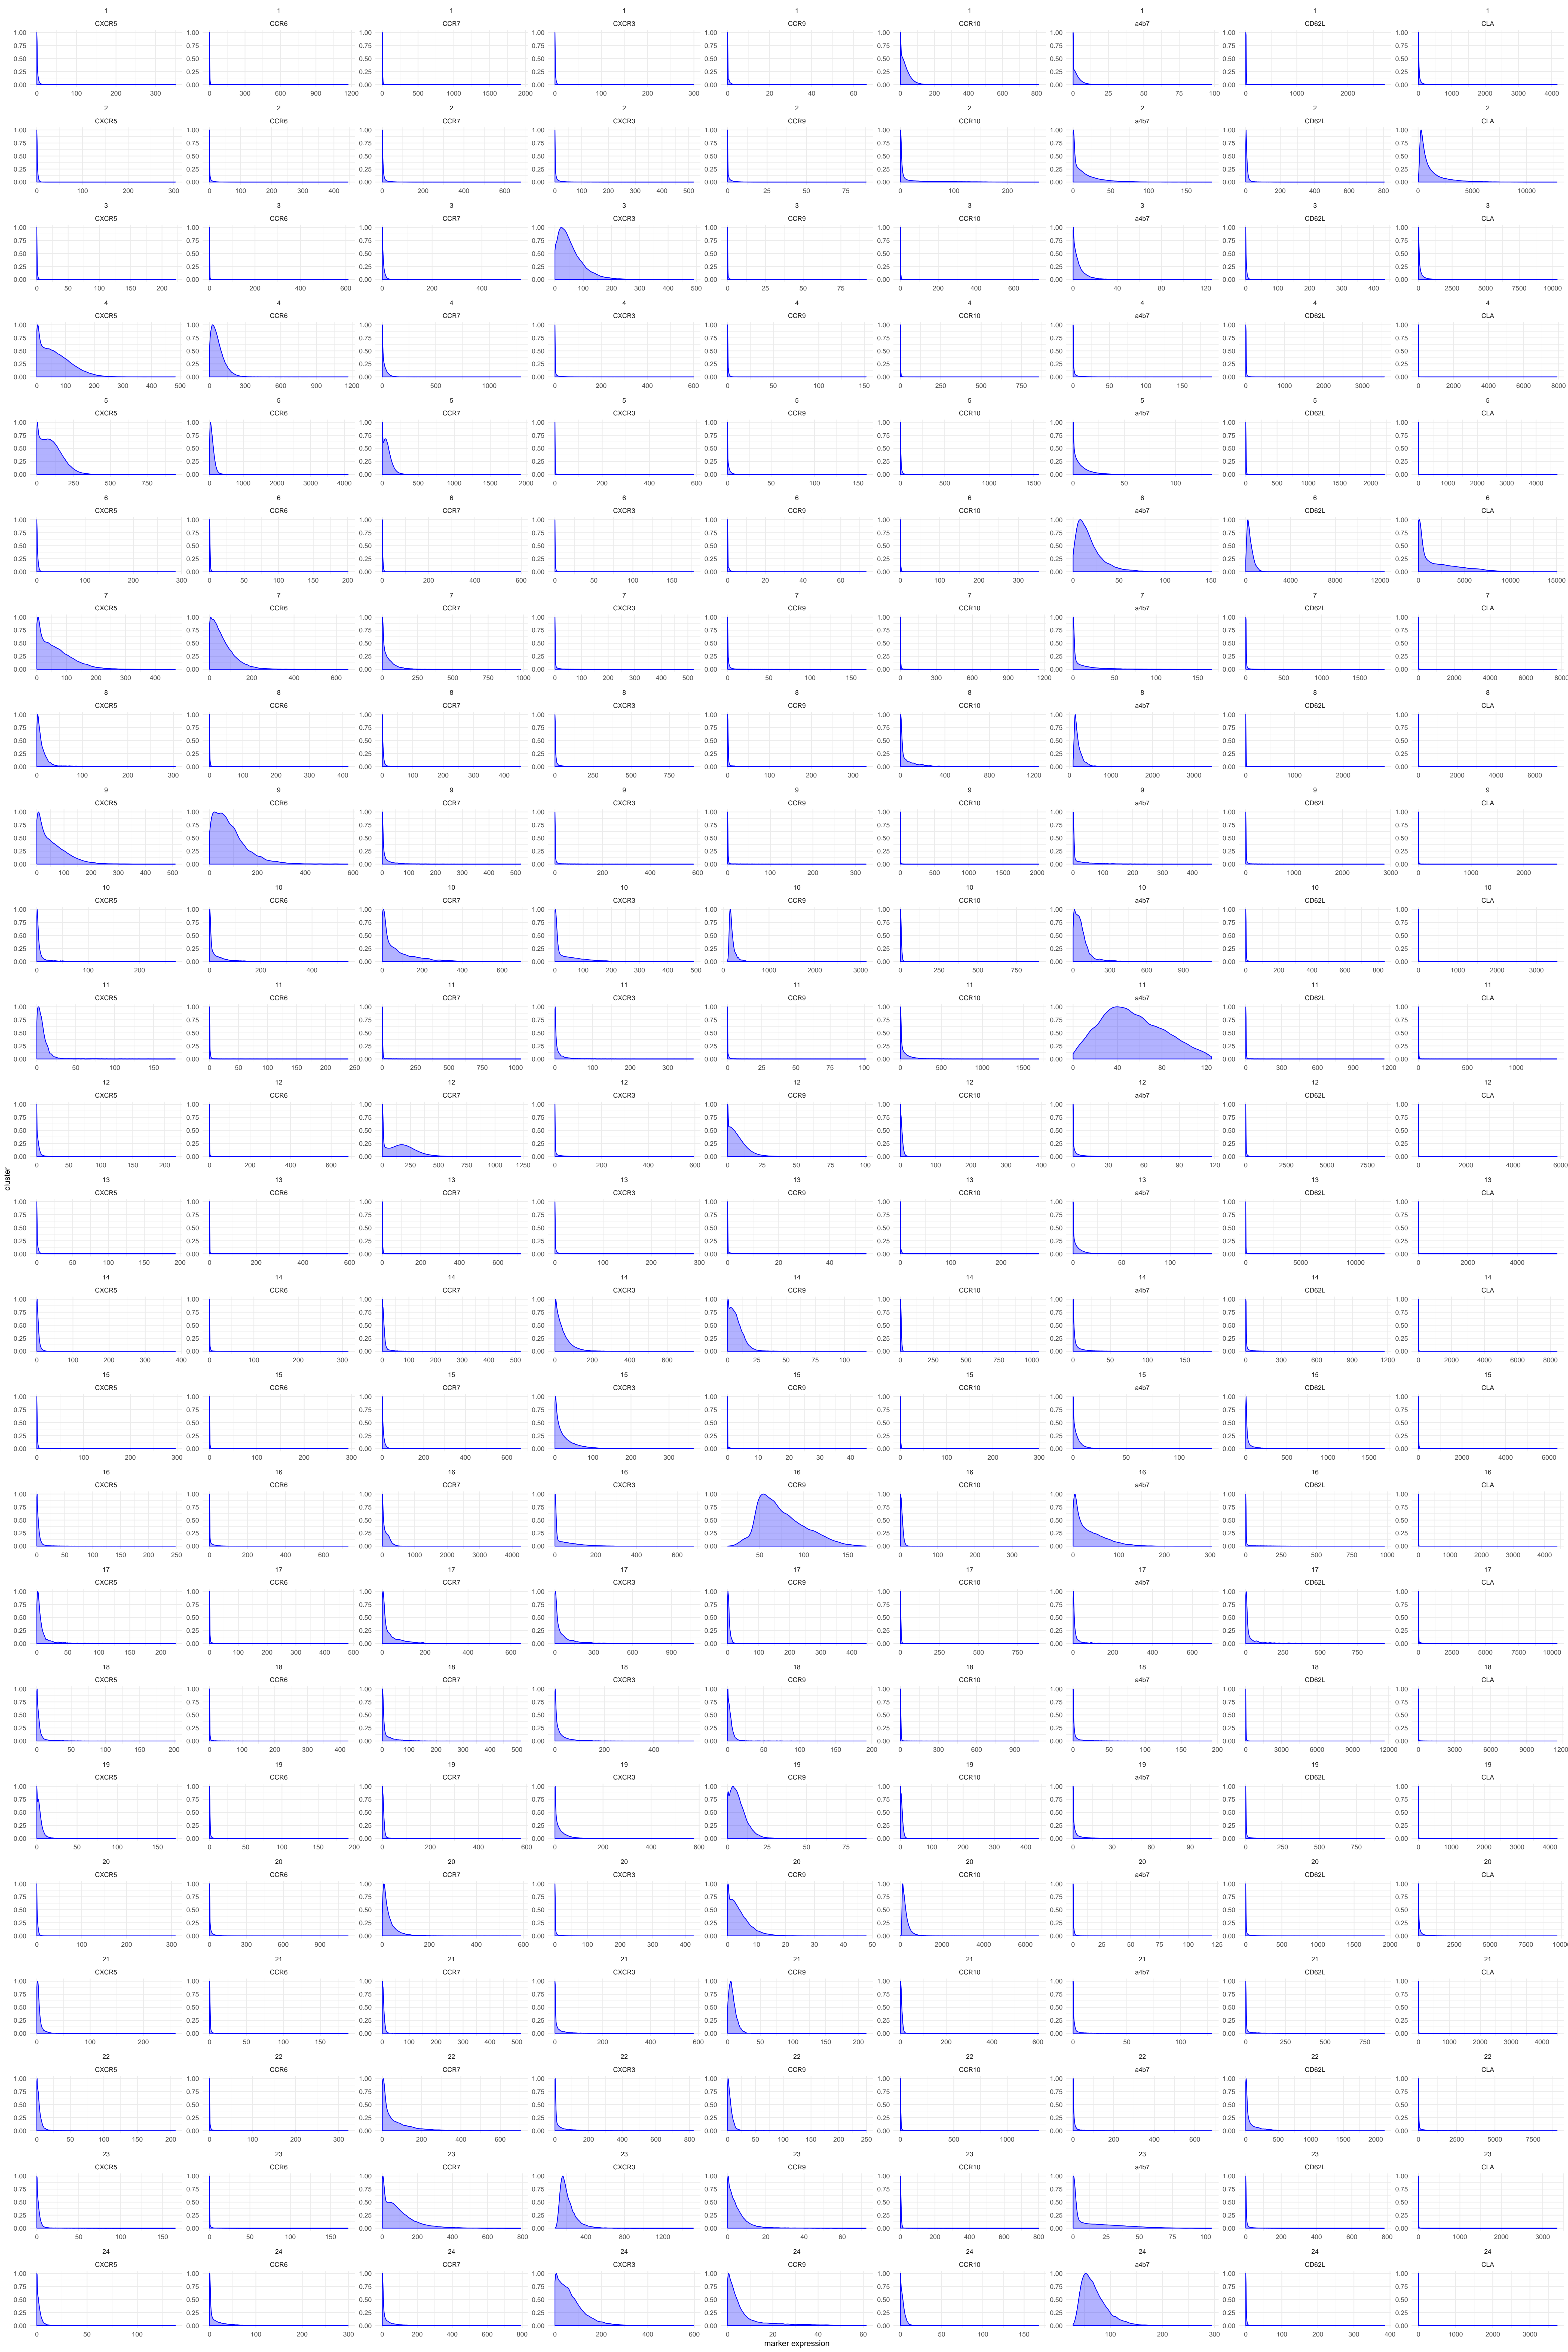

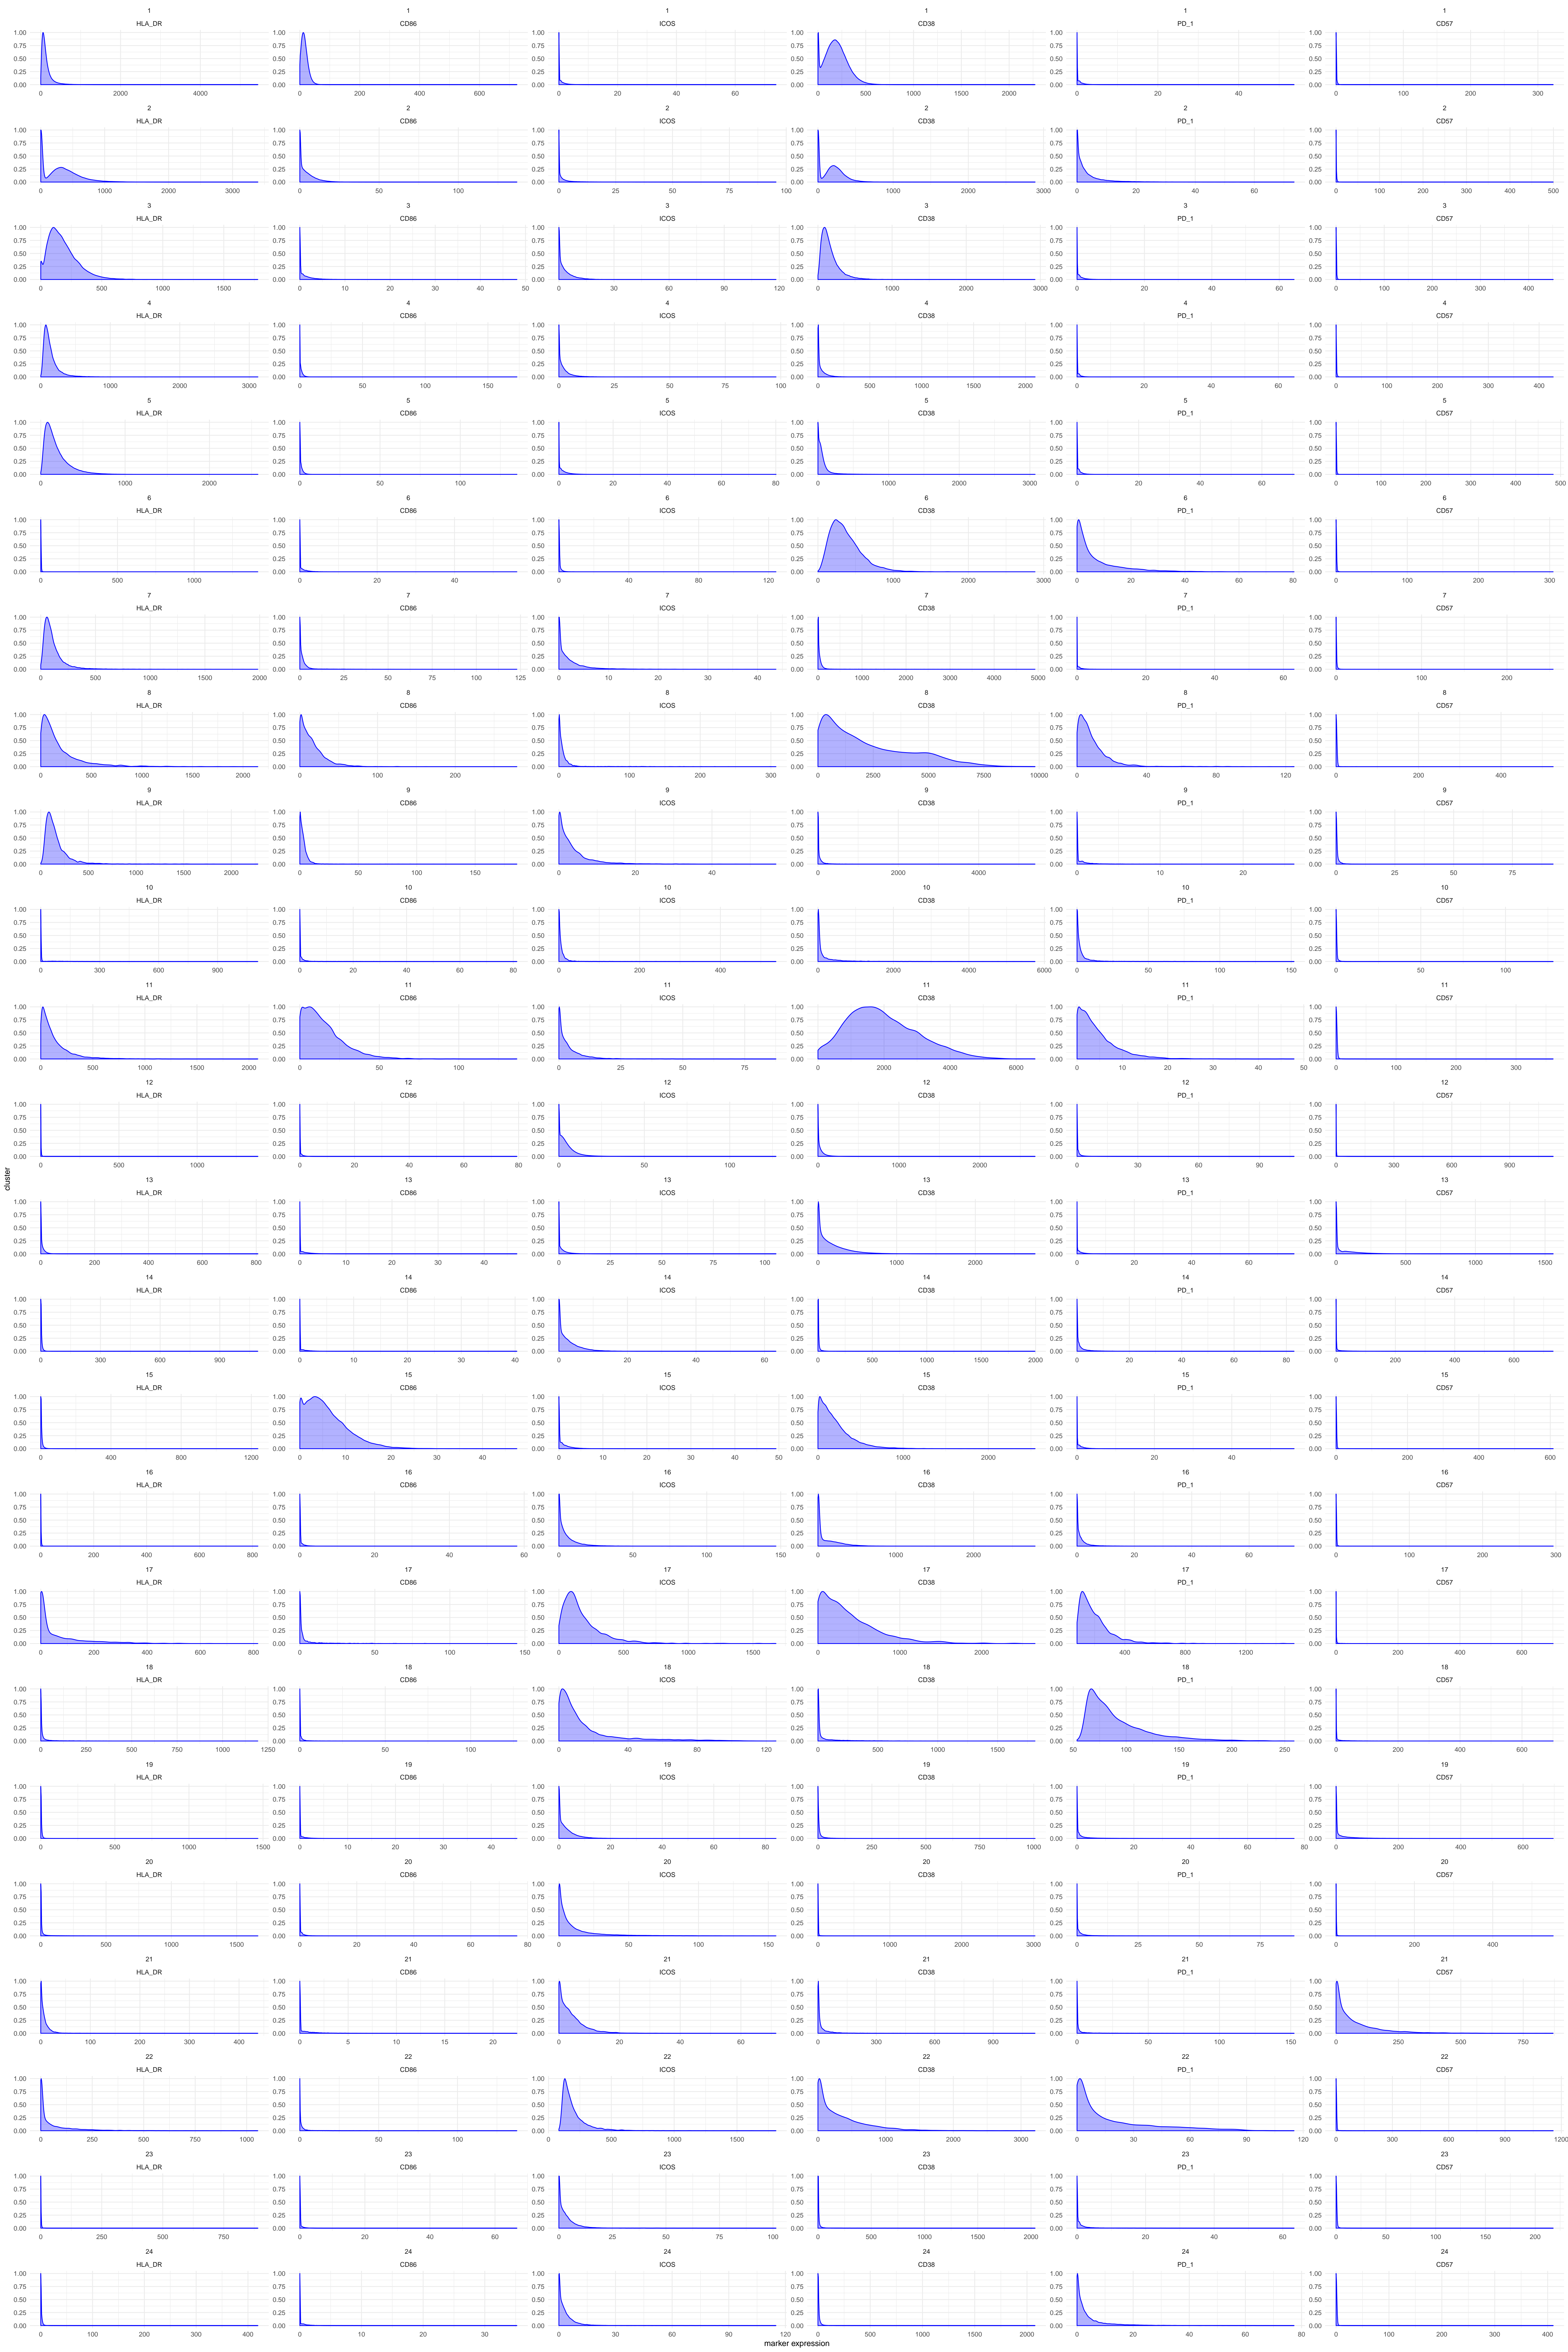

Supplement: DataSheet_7.pdf [file DataSheet_7.pdf]
